# Supplementary material for: An Essential Nonredundant Role for Mycobacterial DnaK in Native Protein Folding
Source: PubMed Central journal article supplement (PMC4109909; doi:10.1371/journal.pgen.1004516), 2014-07-24
Supplement: pgen.1004516.s014.pdf [file pgen.1004516.s014.pdf]

**Table S1. Strains used in this study**

| <b>Strain name</b> | <b>genotype</b>                                                                                    | <b>Source</b> | <b>Details of construction:</b>                                    |
|--------------------|----------------------------------------------------------------------------------------------------|---------------|--------------------------------------------------------------------|
| MC2155             | wildtype                                                                                           | [1]           |                                                                    |
| MGM6002            | $\Delta dnaK attB::dnaK strep$                                                                     | this work     | MC2155 transformed with pAJF510 and then pAJF223                   |
| MGM6003            | $\Delta dnaK attB::dnaK-mCitrine kan$                                                              | this work     | MGM6002 transformed with pAJF200 and verified as StrepS            |
| MGM6005            | $\Delta dnaK attB::kan pAJF241 (Tet-DnaK)$                                                         | this work     | MGM6002 co-transformed with pAJF307 and pAJF241                    |
| MGM6006            | $\Delta dnaK attB::PftsZp1-Ff luciferase kan pAJF241 (Tet-DnaK)$                                   | this work     | MGM6002 co-transformed with pAJF251 and pAJF241                    |
| MGM6007            | $\Delta dnaK attB::dnaK strep clpB:clpB-mCitrine$                                                  | this work     | MGM6002 transformed with pAJF324                                   |
| MGM6008            | $\Delta dnaK attB::zeo clpB:clpB-mCitrine hyg pAJF327 (Tet-DnaK)$                                  | this work     | MGM6007 co-transformed with pDB19 and pAJF327                      |
| MGM6009            | $clpB::clpB-mCitrine$                                                                              | this work     | MC2155 transformed with pAJF324                                    |
| MGM6010            | $\Delta dnaK attB::PftsZp1-Ff luciferase-mCitrine strep pAJF241 (Tet-DnaK)$                        | this work     | MGM6003 co-transformed with pAJF417 and pAJF241                    |
| MGM6011            | $\Delta dnaK attB::dnaK-mCitrine kan pAJF488 (Tet-DnaK)$                                           | this work     | MGM6003 transformed with pAJF488                                   |
| MGM6012            | $clpB:clpB-mCitrine pAJF494 (Tet-mCerulean-ELK16)$                                                 | this work     | MGM6009 transformed with pAJF494                                   |
| MGM6013            | $\Delta dnaK attB::dnaK strep fasl:fasl-mCitrine hyg$                                              | this work     | MGM6002 transformed with pAJF438                                   |
| MGM6014            | $\Delta dnaK attB::zeo fasl:fasl-mCitrine hyg pAJF327 (Tet-DnaK)$                                  | this work     | MGM6013 co-transformed with pDB19 and pAJF327                      |
| MGM6015            | $\Delta dnaK attB::zeo pAJF458 (Tet-DnaK EcmalF(1,2)-3xmCerulean)$                                 | this work     | MGM6002 co-transformed with pDB19 and pAJF458                      |
| MGM6016            | $\Delta dnaK attB::dnaK-mCitrine kan attB_{tweety}::PftsZ1-Ff luciferase strep pAJF499 (Tet-GrpE)$ | this work     | MGM6003 co-transformed with pAJF381 and pAJF499                    |
| MGM6022            | $pAJF480 (Tet-mCitrine-ELK16)$                                                                     | this work     | MC2155 transformed with pAJF480                                    |
| MGM6023            | <i>Mycobacterium bovis</i> BCG $att::dnaK-mCitrine kan$                                            | this work     | <i>M. bovis</i> BCG pasteur (ATCC #35734) transformed with pAJF466 |
| MGM6024            | $attB::dnaK(K70A)-mCitrine kan$                                                                    | this work     | MC2155 transformed with pAJF239                                    |

|         |                                                                                            |           |                                                  |
|---------|--------------------------------------------------------------------------------------------|-----------|--------------------------------------------------|
| MGM6027 | <i>ΔgrpE attB::PdnaK-grpE strep</i>                                                        | this work | MC2155 transformed with pAJF325 and then pAJF512 |
| MGM6028 | <i>Δtig</i>                                                                                | this work | MC2155 transformed with pAJF273                  |
| MGM6031 | <i>Δtig ΔdnaK attB::dnaK-mCitrine kan</i>                                                  | this work | <i>ΔdnaK</i> added with pAJF510                  |
| MGM6052 | <i>Δtig ΔdnaK attB::dnaK strep</i>                                                         | this work | MGM6031 transformed with pAJF223                 |
| MGM6071 | <i>Δtig ΔdnaK attB::PftsZp1-luciferase kan pAJF241 (tetR Pmyc-tetO-dnaK-STII hyg)</i>      | this work | MGM6052 co transformed with pAJF251 and pAJF241  |
| MGM6072 | <i>ΔdnaK attB::dnaK strep pAJF407 (tetR Pmyc-tetO-tig kan)</i>                             | this work | MGM6002 transformed with pAJF407                 |
| MGM6073 | <i>ΔdnaK attB:: PftsZp1-luciferase Pmop-tig kan pAJF241 (tetR Pmyc-tetO-dnaK-STII hyg)</i> | this work | MGM6002 co-transformed with pAJF251 and pAJF298  |

1. Snapper SB, Melton RE, Mustafa S, Kieser T, Jacobs WR, Jr. (1990) Isolation and characterization of efficient plasmid transformation mutants of Mycobacterium smegmatis. Mol Microbiol 4: 1911-1919.
