# Supplementary material for: An Essential Nonredundant Role for Mycobacterial DnaK in Native Protein Folding
Source: PubMed Central journal article supplement (PMC4109909; doi:10.1371/journal.pgen.1004516), 2014-07-24
Supplement: pgen.1004516.s015.pdf [file pgen.1004516.s015.pdf]

**Table S2. Plasmids used in this study**

| <b>Plasmid name</b> | <b>relevant features</b>                                                  | <b>relevant details of construction</b>                                                                                       |
|---------------------|---------------------------------------------------------------------------|-------------------------------------------------------------------------------------------------------------------------------|
| pMV306hsp+FFluc     | <i>attP::P<sub>hsp60</sub>-Ff luciferase kan</i>                          | Addgene plasmid #26156 [1]                                                                                                    |
| Cerulean            | <i>mCerulean</i>                                                          | Addgene plasmid #15214 [2]                                                                                                    |
| pDB19               | <i>attP::zeo</i>                                                          | lab stock                                                                                                                     |
| pDB60               | <i>attP::strep</i>                                                        | lab stock                                                                                                                     |
| pDB88               | <i>hyg, galK, sacB</i>                                                    | lab stock [3]                                                                                                                 |
| pMV306kan           | <i>attP::kan</i>                                                          | lab stock                                                                                                                     |
| pMV261kan           | <i>P<sub>hsp60</sub> kan oriM</i>                                         | lab stock                                                                                                                     |
| pmsg419             | <i>P<sub>Tb21</sub>-tetR(sB) P<sub>myc1-tetO</sub> hyg oriM</i>           | lab stock                                                                                                                     |
| pAJF067             | <i>hyg, galK, sacB</i>                                                    | pDB88 derivative                                                                                                              |
| pAJF198             | <i>5'dnaK flank-3' dnaK flank hyg, galK, sacB</i>                         | pAJF067 with <i>dnaK</i> 5' flank (oAF252/oAF253, MC2155 gDNA) <i>dnaK</i> 3' flank (oAF254/oAF255, MC2155 gDNA)              |
| pAJF200             | <i>attP:: dnaK-mCitrine kan</i>                                           | pMV306kan derivative with <i>dnaK</i> (oAF250/251, MC2155 gDNA) and <i>mCitrine</i> (oAF022/oAF023)                           |
| pAJF223             | <i>attP:: dnaK strep</i>                                                  | pDB60 derivative with <i>dnaK</i> (oAF250/266, MC2155 gDNA)                                                                   |
| pAJF239             | <i>attP:: dnaK(K70A)-mCitrine kan</i>                                     | pAJF200 with 5' <i>dnaK</i> (K70A) (flanks of oAF250/oAF301 and oAF276/oAF302 in pAJF200)                                     |
| pAJF241             | <i>P<sub>Tb21</sub>-tetR(sB) P<sub>myc1-tetO</sub>-dnaK-STII hyg oriM</i> | pmsg419 with <i>dnaK</i> -streptagII (oAF305/oAF280, MC2155 gDNA)                                                             |
| pAJF251             | <i>attP::P<sub>ftsZ(P1)</sub>-Ff luciferase kan</i>                       | pMV306-hsp+FFLuc with <i>PftsW</i> (P1) (oAF312/313, MC2155 gDNA)                                                             |
| pAJF273             | <i>5'tig flank-3' tig flank hyg, galK, sacB</i>                           | pAJF067 derivative with <i>tig</i> 5' flank (oAF347/oAF348, MC2155 gDNA) and <i>tig</i> 3' flank (oAF349/oAF350, MC2155 gDNA) |
| pAJF298             | <i>attB:: PftsZp1-luciferase Pmop-tig kan</i>                             | pAJF251 derivative with <i>tig</i> (oAF336/oAF337, MC2155 gDNA)                                                               |
| pAJF307             | <i>pMV306Kan No Integrase</i>                                             | pMV306kan derivative with integrase sequence removed                                                                          |
| pAJF324             | <i>3'clpB-mCitrine hyg</i>                                                | 3' <i>clpB</i> (oAF400/oAF401, MC2155 gDNA)                                                                                   |

|         |                                                                                                        |                                                                                                                   |
|---------|--------------------------------------------------------------------------------------------------------|-------------------------------------------------------------------------------------------------------------------|
| pAJF325 | <i>5'grpE flank-3' grpE flank hyg, galK, sacB</i>                                                      | pAJF067 derivative with grpE 5' flank (oAF412/oAF413, MC2155 gDNA) and grpE 3' flank (oAF414/oAF415, MC2155 gDNA) |
| pAJF327 | <i>P<sub>Tb21</sub>-tetR(sB) P<sub>myc1-tetO</sub>-dnaK-STII kan oriM</i>                              | derivative of pAJF241 encoding kanamycin resistance                                                               |
| pAJF381 | <i>attP(tweety)::P<sub>ftsZ(P1)</sub>-Ff luciferase int(tweety) strep</i>                              | PftsZ1-Ff luciferase fragment from pAJF251 inserted at EcoRV site                                                 |
| pAJF407 | <i>P<sub>Tb21</sub>-tetR(sB) P<sub>myc1-tetO</sub>-dnaK-STII kan oriM</i>                              | pAJF327 derivative with tig (oAF575/oAF576, MC2155 gDNA)                                                          |
| pAJF417 | <i>attP::P<sub>ftsZ(P1)</sub>-Ff luciferase-linker-mCitrine strep</i>                                  | pDB60 derivative with PftsZ(P1)-Ff luciferase from oAJF251 fused to mCitrine                                      |
| pAJF438 | <i>3'fas-linker-mCitrine-STII hyg</i>                                                                  | 3' fasI (oAF642/oAF643, MC2155 gDNA)                                                                              |
| pAJF446 | <i>P<sub>hsp60</sub>-Ec maL<sub>(TM1,2)</sub>-mCerulean-linker-mCerulean-linker-mCerulean kan</i>      | pMV261kan derivative with E. coli maIF <sub>(TM1,2)</sub> (oAF578/579, MG1665 gDNA)                               |
| pAJF447 | <i>attP:: dnaK-twinStrep kan</i>                                                                       | pAJF200 with mCitrine removed and twinStrep added by oligo ligation (oAF651/oAF652)                               |
| pAJF458 | <i>P<sub>Tb21</sub>-tetR(sB) P<sub>myc1-tetO</sub>-dnaK-STII hyg oriM Phsp60-EcmalF1,2-3xmCerulean</i> | pAJF241 derivative with Phsp60-EcmalF1,2-3xmCerulean cut from pAJF446                                             |
| pAJF466 | <i>attB::BCG dnaK-mCitrine strep</i>                                                                   | BCG dnaK (oAF674/oAF676, BCG gDNA )                                                                               |
| pAJF480 | <i>P<sub>Tb21</sub>-tetR(sB) P<sub>myc-tetO</sub>-mCitrine-ELK16 hyg oriM</i>                          | pmsg419 derivative with mCitrine-ELK16 (tag added with ligation of annealed oligos oAF708 and oAF709)             |
| pAJF488 | <i>P<sub>Tb21</sub>-tetR(sB) P<sub>myc1-tetO</sub>-mCerulean-ELK16 hyg oriM</i>                        | pmsg419 derivative with mCerulean-ELK16 (tag added with ligation of annealed oligos oAF708 and oAF709)            |
| pAJF494 | <i>P<sub>Tb21</sub>-tetR(sB) P<sub>myc1-tetO</sub>-mCerulean-ELK16 strep oriM</i>                      | pAJF488 derivative encoding streptomycin resistance                                                               |
| pAJF499 | <i>P<sub>Tb21</sub>-tetR(sB), P<sub>myc1-tetO</sub>-grpE-STII, hyg, oriM</i>                           | pmsg419 derivative with grpE-STII (oAF469/470, MC2155 gDNA)                                                       |
| pAJF509 | <i>attP::P<sub>dnaK</sub>-grpE kan</i>                                                                 | pMV306kan derivative with PdnaK (oAF330/oAF331, MC2155 gDNA) and grpE (oAF762/764, MC2155 gDNA)                   |
| pAJF512 | <i>attP::P<sub>dnaK</sub>-grpE strep</i>                                                               | pDB60 with PdnaK-grpE from pAJF509                                                                                |

1. Andreu N, Zelmer A, Fletcher T, Elkington PT, Ward TH, et al. (2010) Optimisation of bioluminescent reporters for use with mycobacteria. PLoS One 5: e10777.

- 2 Rizzo MA, Springer GH, Granada B, Piston DW (2004) An improved cyan fluorescent protein variant useful for FRET. *Nat Biotechnol* 22: 445-449.
3. Barkan D, Stallings CL, Glickman MS (2011) An improved counterselectable marker system for mycobacterial recombination using galk and 2-deoxy-galactose. *Gene* 470: 31-36.
