# Supplementary material for: An Essential Nonredundant Role for Mycobacterial DnaK in Native Protein Folding
Source: PubMed Central journal article supplement (PMC4109909; doi:10.1371/journal.pgen.1004516), 2014-07-24
Supplement: pgen.1004516.s016.pdf [file pgen.1004516.s016.pdf]

**Table S3. Oligos used in this study.**

A.

**Oligos for qPCR**

| Oligo Name | 5'-3' sequence           | gene         |
|------------|--------------------------|--------------|
| oAF485     | CCAAGCGGGCAGCCAAG        | <i>sigA</i>  |
| oAF486     | GGGCTCAGCCTCGAGATCGTC    | <i>sigA</i>  |
| oAF473     | CGCTGGCAACCCGGAGATC      | <i>clpB</i>  |
| oAF474     | TGGGCAGACGGTTCGAGCAA     | <i>clpB</i>  |
| oAF475     | CACCGAGCTTGAGCCCGACTT    | <i>tig</i>   |
| oAF476     | GGGCAGCGCGTCGTTGA        | <i>tig</i>   |
| oAF496     | CGAGGACCCCTACGAGAAGAT    | <i>groL1</i> |
| oAF497     | GGGTGCGCCGGCAGC          | <i>groL1</i> |
| oAF502     | GGTGCTGGCCAAGTCTTTCGG    | <i>groL2</i> |
| oAF503     | CACCGGCGACGTCGTTGG       | <i>groL2</i> |
| oAF500     | GCACATCCTTTTGGGACTTATTCA | <i>clpC</i>  |
| oAF501     | CAGCTCGAGCACCTTCTTGGC    | <i>clpC</i>  |
| oAF508     | ACGTTTCTGATCTCTGTGGC     | <i>hspR</i>  |
| oAF509     | AGCCGCTGCACCTCTCGC       | <i>hspR</i>  |
| oAF518     | ACGCCGCGGTGTGGAC         | <i>hsp20</i> |
| oAF519     | CCACACCGGGGAGTTCG        | <i>hsp20</i> |

B.

**Oligos used for plasmid construction**

| Oligo Name | 5'-3' sequence                                         |
|------------|--------------------------------------------------------|
| oAF022     | GGCAGATCTCATATGATGGTGAGCAAGGGCG                        |
| oAF023     | GATCAAGCTTTTACTTGTACAGCTCGTC                           |
| oAF250     | GAATCTAGAAGAAGAACCTGGTGG                               |
| oAF251     | GATCATATGCTTGTTCCTTCCCTTGCC                            |
| oAF252     | GATACTAGTCCGGTCCGCGGAAAC                               |
| oAF253     | GTTTCATATGGTTCTTGCCCTCCTGATAG                          |
| oAF255     | GTTCCCTAGGCCCCAGAGCCGTCCTC                             |
| oAF280     | GTCAATTGTTACTTTTTCGAACTGCGGGTGGCTCCACTTGTTCCTTCCCTTGCC |
| oAF301     | CACCATCCGTTTCGGTCGCGCGCCACGTCGGCAC                     |
| oAF302     | GTGCCGACGTGGCGCGGACCGAACGGATGGTG                       |
| oAF305     | GTTGCATGCCCTATATCTATCAGG                               |
| oAF312     | GTTGCGGCCGCTACCGTTCTGTTTGC                             |
| oAF313     | GTCGAATTCGGTTGGGTGCTCTGG                               |
| oAF330     | GATTCTAGACATGGCGATGCGTGAAC                             |
| oAF331     | GTTCCATGGTCTTGCCCTCCTGATAG                             |

oAF336 GTTCATATGGACACCCGAGAAAGACATC  
oAF337 GTTATCGATTCACTTGTCGGTGTCG  
oAF347 GTTACTAGTGTAGTAGCCAGGCGGATAC  
oAF348 GATCATATGCTTGTGCTCCTTGATG  
oAF349 GATCATATGCGCTGTGAGCGAAC  
oAF350 GTTCCTAGGGAATCGGCCTCGATG  
oAF400 GTATGCGCATGGAGATCG  
oAF401 GTCCATATGGCCAAAACGAGGGAC  
oAF412 GTTACTAGTCTCGCACAACAAGCTG  
oAF413 GTTCATATGTTGTTCTCCTTGCCAG  
oAF414 GTTCATATGACAGATCCGACTAGAAAG  
oAF415 GTTCCTAGGTGATCACACCGGAGCC  
oAF469 GTTGCATGCACGATGACGCTGGCAAG  
oAF470 GTCAAGCTTACTTTTTCGAACTGCGGGTGGCTCCAATTGTCTGATTCTGC  
oAF575 GTTATCGATGTGAAGAGCACAGTCG  
oAF576 GATAACGTTACTTGTCGGTGTCTGTCG  
oAF478 GGATCTCCGCGGGTTTGGG  
oAF578 GCCTGGCCAGCGATGTCATTAAAAAG  
oAF579 GACCATATGGGCTTTACGATTGGC  
oAF642 GATTCTAGAAAGCACGACACCTCG  
oAF643 GTTCATATGCAGGACGTA CTGATC  
TATGTCAGCATGGAGCCACCCG CAGTT CGAAAAGGGCGGTGGATCAGGCGGCGGATCCGGAGGATC  
oAF651 AGCATGGAGTCATCCACAATTCGAGAAGTA  
AGCTTACTTCTCGAATTGTGGATGACTCCATGCTGATCCTCCGGATCCGCCGCCTGATCCACCGCC  
oAF652 CTTTTCGAACTGCGGGTGGCTCCATGCTGACA  
oAF674 GAATCTAGAATCGAGGAGTGGGTG  
oAF676 GTTCATATGCTTGGCCTCCCGGCCGTC  
oAF708 AATTCCTCGAGCTGGAAGTGAAGCTCGAGCTGGAGCTGAAACTCAAGTA  
oAF709 AGCTTACTTGAGTTTCAGCTCCAGCTCGAGCTTCAACTTCAGTTCCAGCTCGAGG  
oAF762 GCGCAGTCCGCTCAGAACGATGACGCTGGCAAG  
oAF764 CGTCGACATCGATAAGCTTAATTGTCTGATTCTGC  
oAF768 GAACATATGAGGCCGAACAGCCCGCG
